# Supplementary material for: Role of the ESCRT Complexes in Telomere Biology
Source: PubMed Central journal article supplement (PMC5101353; doi:10.1128/mbio.01793-16), 2016-11-08
Supplement: mbo006163063sf1.pdf [file mbo006163063sf1.pdf]

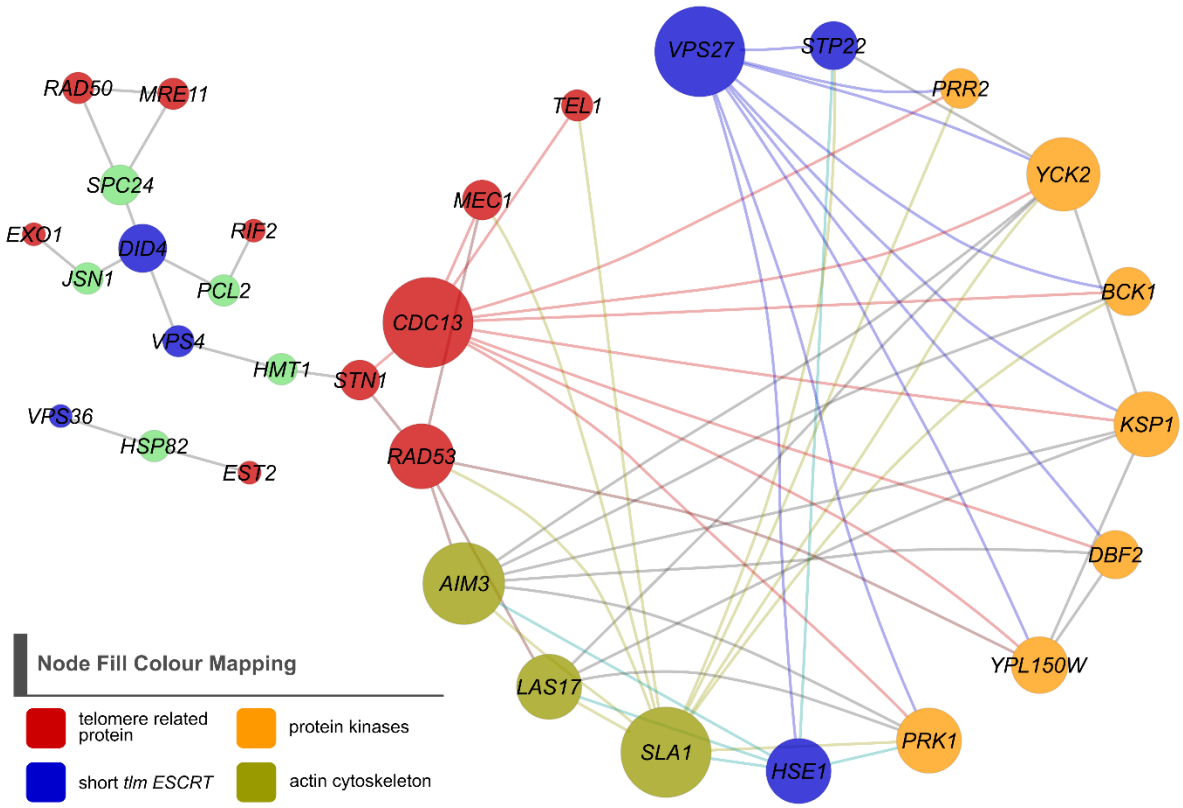

Suppl. Fig. 1
