# Supplementary material for: Role of the ESCRT Complexes in Telomere Biology
Source: PubMed Central journal article supplement (PMC5101353; doi:10.1128/mbio.01793-16), 2016-11-08
Supplement: mbo006163063st1.pdf [file mbo006163063st1.pdf]

**Suppl. Table 1. Yeast strains used in this study.** Yeast strains used in this study were either derivatives from the BY4741 background (*his3Δ1, leu2Δ0, ura3Δ0, met15Δ0*) or from YKM139 (yAM344, yAM436, and yAM437; background *hmlΔ::ADE1 hmrΔ::ADE1 ade1-100 leu2-3,112 lys5 trp1::hisG ade3::GAL-HO*). Haploid strains were derived from the listed diploids.

| Code   | Genotype                                                                      |
|--------|-------------------------------------------------------------------------------|
| yAM223 | MATa $\Delta vps27::KAN$                                                      |
| yAM225 | MATa/MATalpha <i>EST2/est2::HIS VPS27/vps27::KAN</i>                          |
| yAM229 | MATa <i>CDC13::cdc13-1 HIS <math>\Delta vps27::KAN</math></i>                 |
| yAM234 | MATalpha <i>CDC13::cdc13-1 HIS <math>\Delta vps27::KAN</math></i>             |
| yAM235 | MATa EXO1-TAP (HIS) $\Delta vps27::KAN$                                       |
| yAM269 | MATa/MATalpha <i>HSC82/hsc82::KAN CDC13/CDC13::cdc13-1 HIS</i>                |
| yAM270 | MATa/MATalpha <i>CDC13-TAP (HIS) VPS27/vps27::KAN</i>                         |
| yAM274 | MATa $\Delta stp22::KAN$                                                      |
| yAM275 | MATa $\Delta vps28::KAN$                                                      |
| yAM278 | MATa $\Delta snf8::KAN$                                                       |
| yAM282 | MATa $\Delta snf7::KAN$                                                       |
| yAM285 | MATa $\Delta did2::KAN$                                                       |
| yAM290 | MATa $\Delta bro1::KAN$                                                       |
| yAM297 | MATalpha $\Delta vps27::NAT$                                                  |
| yAM325 | MATa/MATalpha <i>SAE2-TAP (HIS) VPS27/vps27::KAN</i>                          |
| yAM386 | MATa/MATalpha <i>CDC13/CDC13::cdc13-1 KAN VPS27/vps27::NAT EXO1-TAP (HIS)</i> |
| yAM387 | MATa <i>CDC13::cdc13-1 KAN <math>\Delta vps27::NAT EXO1-TAP (HIS)</math></i>  |
| yAM433 | MATa $\Delta vps27::KAN$                                                      |
| yAM436 | MATa $\Delta vps27::KAN$                                                      |
| yAM437 | MATa $\Delta vps27::KAN$                                                      |
| yAM443 | MATa/MATalpha <i>CDC13/CDC13::cdc13-1 HIS HSE1/hse1::KAN</i>                  |
| yAM444 | MATa/MATalpha <i>CDC13/CDC13::cdc13-1 HIS STP22/stp22::KAN</i>                |
| yAM445 | MATa/MATalpha <i>CDC13/CDC13::cdc13-1 HIS VPS28/vps28::KAN</i>                |
| yAM446 | MATa/MATalpha <i>CDC13/CDC13::cdc13-1 HIS SRN2/srn2::KAN</i>                  |
| yAM447 | MATa/MATalpha <i>CDC13/CDC13::cdc13-1 HIS VPS4/vps4::KAN</i>                  |
| yAM448 | MATa/MATalpha <i>CDC13/CDC13::cdc13-1 HIS VTA1/vta1::KAN</i>                  |
| yAM449 | MATa/MATalpha <i>CDC13/CDC13::cdc13-1 HIS MVB12/mvb12::KAN</i>                |
| yAM450 | MATa/MATalpha <i>CDC13/CDC13::cdc13-1 HIS SNF8/snf8::KAN</i>                  |
| yAM451 | MATa/MATalpha <i>CDC13/CDC13::cdc13-1 HIS VPS25/vps25::KAN</i>                |

|        |                                                                |
|--------|----------------------------------------------------------------|
| yAM452 | MATa/MATalpha <i>CDC13/CDC13::cdc13-1 HIS VPS36/vps36::KAN</i> |
| yAM453 | MATa/MATalpha <i>CDC13/CDC13::cdc13-1 HIS VPS20/vps20::KAN</i> |
| yAM454 | MATa/MATalpha <i>CDC13/CDC13::cdc13-1 HIS SNF7/snf7::KAN</i>   |
| yAM455 | MATa/MATalpha <i>CDC13/CDC13::cdc13-1 HIS VPS24/vps24::KAN</i> |
| yAM456 | MATa/MATalpha <i>CDC13/CDC13::cdc13-1 HIS VPS2/vps2::KAN</i>   |
| yAM457 | MATa/MATalpha <i>CDC13/CDC13::cdc13-1 HIS DID2/did2::KAN</i>   |
| yAM458 | MATa/MATalpha <i>CDC13/CDC13::cdc13-1 HIS VPS60/vps60::KAN</i> |
| yAM459 | MATa/MATalpha <i>CDC13/CDC13::cdc13-1 HIS IST1/ist1::KAN</i>   |
| yAM460 | MATa/MATalpha <i>CDC13/CDC13::cdc13-1 HIS BRO1/bro1::KAN</i>   |
| yBL7   | MATa                                                           |
| yBL679 | MATalpha                                                       |
| yJK162 | MATa EXO1-TAP (HIS)                                            |
| yJK199 | MATalpha <i>CDC13::cdc13-1 HIS</i>                             |
| yJK244 | MATa <i>CDC13::cdc13-1 KAN EXO1-TAP (HIS)</i>                  |
| ySLG60 | MATalpha <i>Δrad9::KAN</i>                                     |
| ySLG70 | MATalpha <i>CDC13::cdc13-1 KAN Δrad9::KAN</i>                  |
