# Supplementary material for: Role of the ESCRT Complexes in Telomere Biology
Source: PubMed Central journal article supplement (PMC5101353; doi:10.1128/mbio.01793-16), 2016-11-08
Supplement: mbo006163063st2.pdf [file mbo006163063st2.pdf]

**Table S2. Oligonucleotides used in this study.**

| <b>Code</b> | <b>Name</b>      | <b>Sequence</b>            |
|-------------|------------------|----------------------------|
| oBL29       | KAN/NAT reverse  | CTGCAGCGAGGAGCCGTAAT       |
| oBL207      | telomeric repeat | CACCACACCCACACACCACCCACA   |
| oBL358      | 1L forward       | GCGGTACCAGGGTTAGATTAGGGCTG |
| oBL359      | oligo dG         | CGGGATCCG <sub>18</sub>    |
| oBL361      | 6Y' forward      | TTAGGGCTATGTAGAAGTGCTG     |
| oJK73       | VPS27 forward    | AGTTAGCACGCGCATATCCA       |
| oJK74       | VPS27 reverse    | AGAACAAGAGCTGGACGGTG       |
| oJK75       | VPS27 forward    | CCTGTGGTATGTTTTGAAGGGC     |
