# Supplementary material for: Role of the ESCRT Complexes in Telomere Biology
Source: PubMed Central journal article supplement (PMC5101353; doi:10.1128/mbio.01793-16), 2016-11-08
Supplement: mbo006163063st3.pdf [file mbo006163063st3.pdf]

**Suppl. Table 3. List of all ESCRT genes.** The individual ESCRT subunits, associated proteins and their biological role. Alternative metazoan names are provided in brackets. Bold letters mark those members of the ESCRT family whose corresponding mutants showed short telomeres. MVB, MVB biogenesis; A, autophagy; V, viral budding; and C, cytokinesis.

| Complex    | Yeast        | Metazoan           | Biological Role |   |   |   |
|------------|--------------|--------------------|-----------------|---|---|---|
|            |              |                    | MVB             | A | V | C |
| ESCRT-0    | <b>Vps27</b> | HRS (HGS)          | x               | x |   |   |
|            | Hse1         | STAM1,2            | x               | x |   |   |
| ESCRT-I    | <b>Stp22</b> | TSG101             | x               | x | x | x |
|            | <b>Vps28</b> | VPS28              | x               | x | x | x |
|            | Srn2         | VPS37A-D           | x               | x | x | x |
|            | Mvb12        | MVB12A,B           | x               | x | x | x |
| ESCRT-II   | <b>Snf8</b>  | VPS22 (EAP30)      | x               | x |   |   |
|            | <b>Vps25</b> | VPS25 (EAP20)      | x               | x |   |   |
|            | <b>Vps36</b> | VPS36 (EAP45)      | x               | x |   |   |
| ESCRT-III  | <b>Vps20</b> | VPS20 (CHMP6)      | x               | x |   |   |
|            | Did4         | VPS2A,B (CHMP2A,B) | x               | x | x | x |
|            | Vps24        | VPS24 (CHMP3)      | x               | x | x | x |
|            | <b>Snf7</b>  | SNF7A-C (CHMP4A-C) | x               | x | x | x |
| ESCRT-IIIa | Did2         | DID2A,B (CHMP1A,B) | x               |   | x | x |
|            | Vps60        | CHMP5              | x               |   |   | x |
|            | Ist1         | IST1               | x               | x | x | x |
| Other      | Vps4         | VPS4A,B            | x               | x | x | x |
|            | Vta1         | VTA1 (LIP5)        | x               | x | x | x |
|            | <b>Bro1</b>  | ALIX (AIP1)        | x               | x | x | x |
